# Supplementary material for: Rational design of a 3D MoS2/dual-channel graphene framework hybrid as a free-standing electrode for enhanced lithium storage
Source: Royal Society of Chemistry journal article supplement (doi:10.1039/c8ta03272f), 2018-01-01
Supplement: c8ta03272f1.pdf [file c8ta03272f1.pdf]

**Electronic Supplementary Information for**

**Rational Design of 3D MoS<sub>2</sub>/Dual-channel graphene framework hybrid as a free-standing electrode for Enhanced Lithium Storage**

Wenxu Wang<sup>a</sup>, Puhen Yang<sup>a</sup>, Zhixu Jian<sup>a</sup>, Honglei Li<sup>a</sup>, Yalan Xing<sup>a</sup>, Shichao Zhang<sup>a\*</sup>

<sup>a</sup>School of Materials Science and Engineering, Beihang University, Beijing 100191, PR China. E-mail: csc@buaa.edu.cn (S. C. Zhang). Tel.: +86 01082339319; fax: +86 01082338148.

This PDF file includes:

Supplementary Figures S1 to S10, and Table S1 to S2

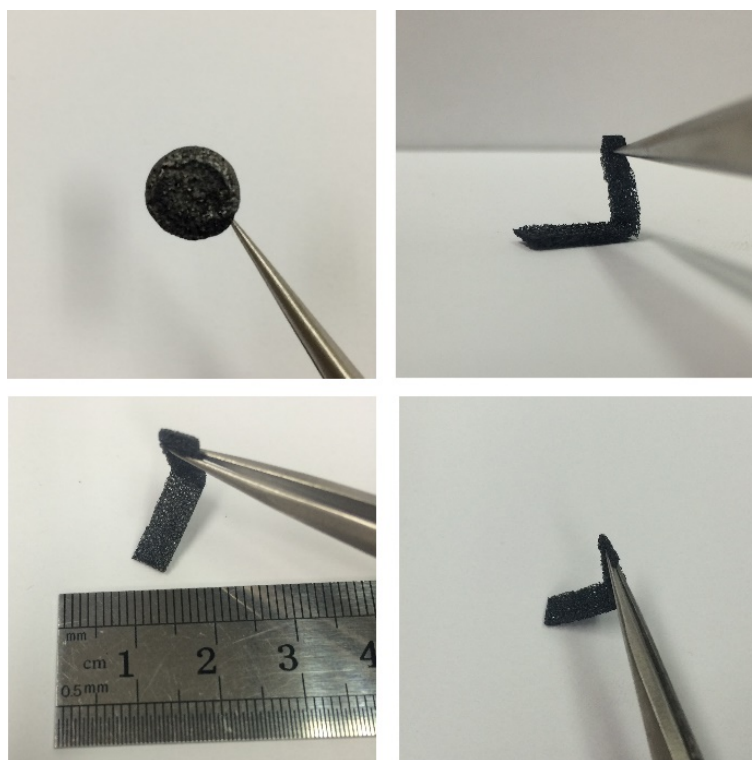

**Fig. S1** The photograph of the as-prepared MoS<sub>2</sub>/GA-GF free-standing electrode.

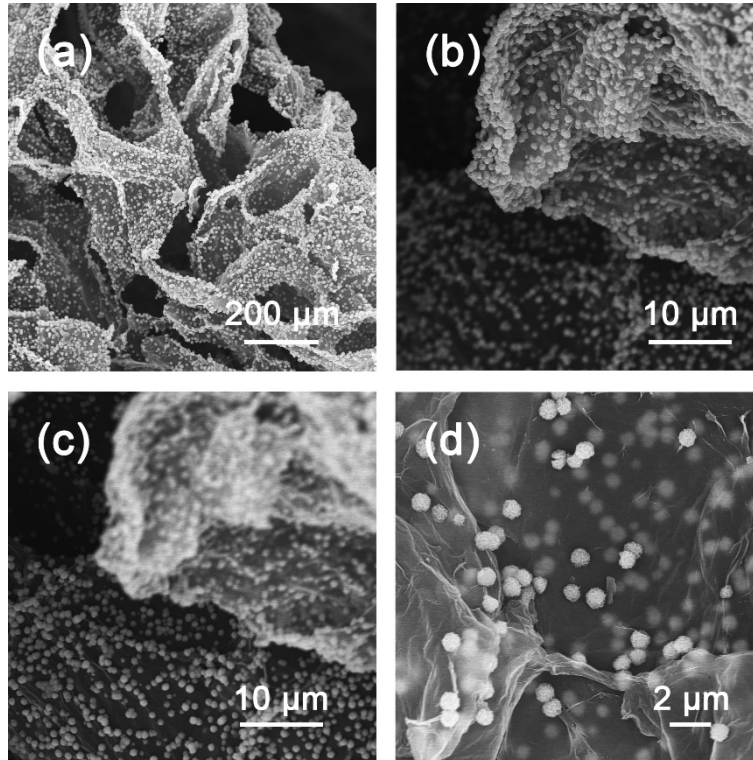

**Fig. S2** FE-SEM images of MoS<sub>2</sub>/GA-GF.  
MoS<sub>2</sub>-PHSs are uniformly distributed on GA-GF surface.

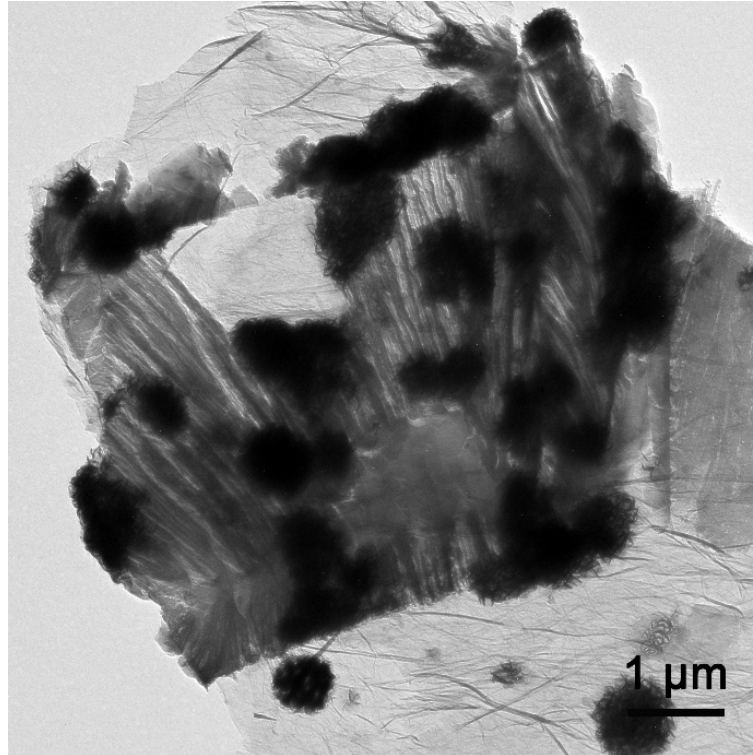

**Fig. S3** TEM image of MoS<sub>2</sub>/GA-GF.  
After 30min sonication, the MoS<sub>2</sub>-PHSs are still firmly growth on GA-GF surface.

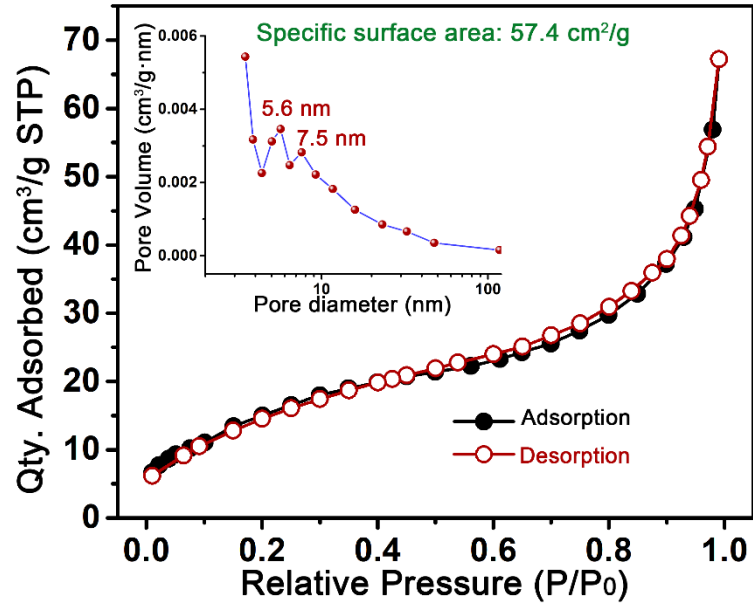

**Fig. S4** The Nitrogen adsorption/desorption isotherms and pore size distribution of the MoS<sub>2</sub>/GA-G hybrid

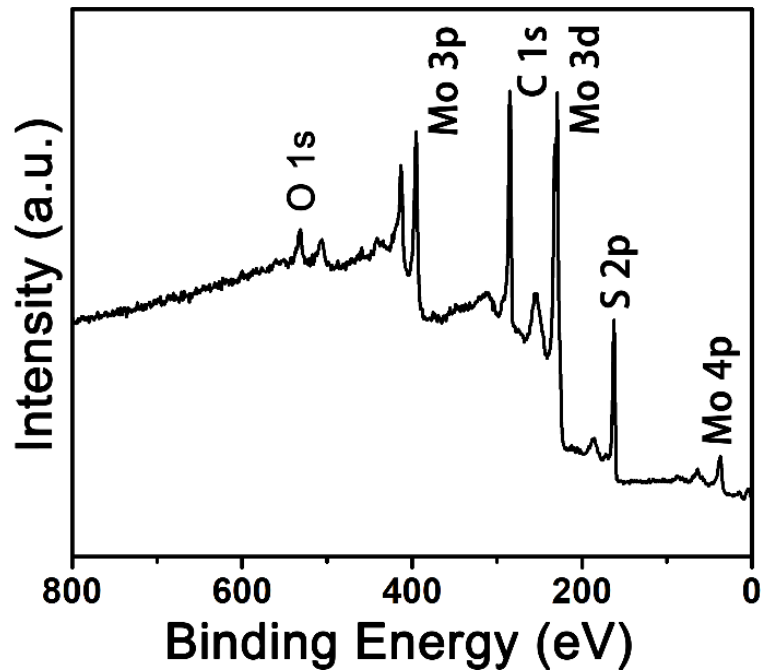

**Fig. S5** The XPS survey spectrum of MoS<sub>2</sub>/GA-GF hybrid

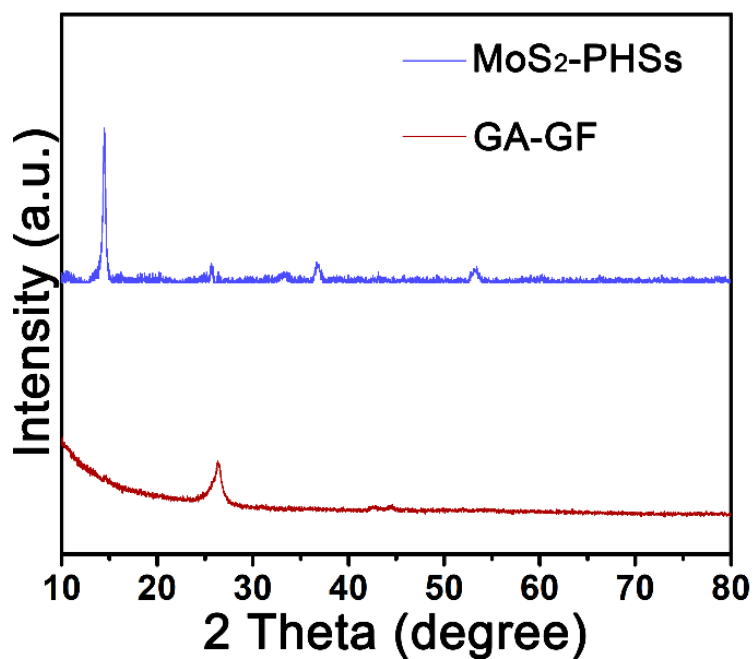

**Fig. S6** XRD pattern of MoS<sub>2</sub>-PHSs and GA-GF.

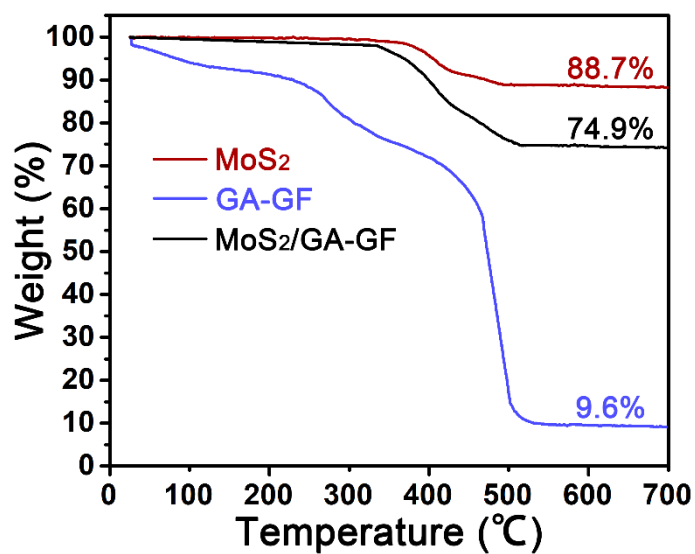

**Fig. S7** Thermogravimetric analysis (TGA) of MoS<sub>2</sub>/GA-GF hybrid, GA-GF, and MoS<sub>2</sub> sample. The TGA were carried out from room temperature to 700 °C with the heating rate of 10 °C min<sup>-1</sup> in air. It is indicated that the MoS<sub>2</sub> weight content in the MoS<sub>2</sub>/GA-GF hybrid is nearly 82.6%.

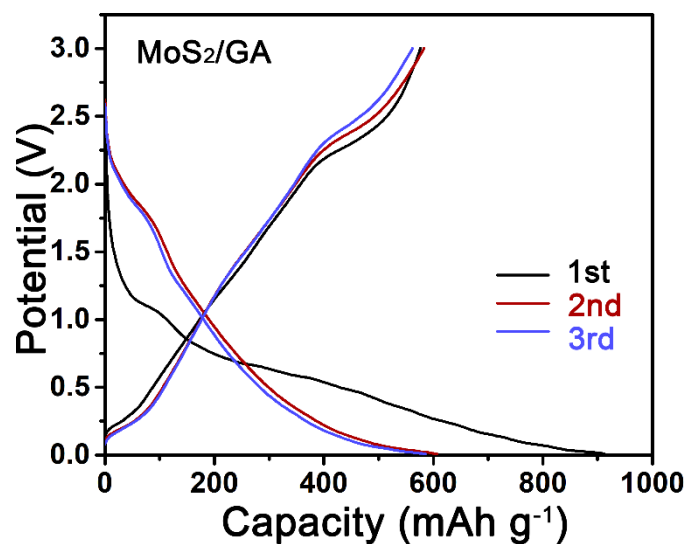

**Fig. S8** The galvanostatic charge/discharge curves at 0.2 A g<sup>-1</sup> of the first three cycles for the MoS<sub>2</sub>/GA electrode.

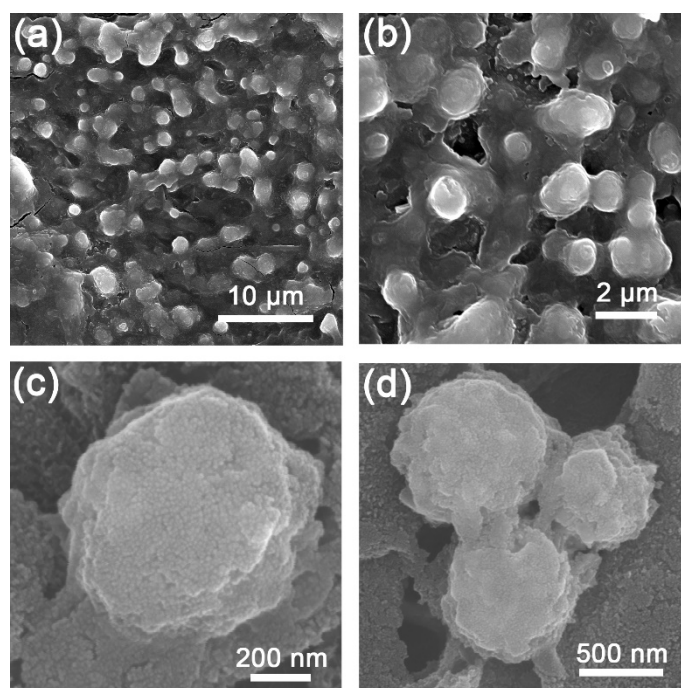

**Fig. S9** SEM image of the MoS<sub>2</sub>/GA-GF after 200 cycles at 0.2 A g<sup>-1</sup>.

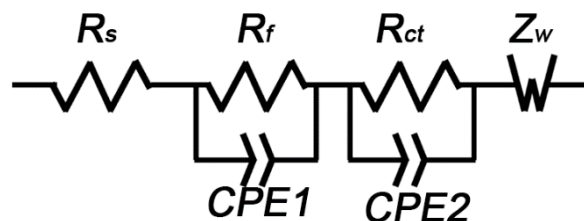

**Fig. S10** Equivalent circuit used for simulating the experimental impedance data.

**Table S1** The impedance value of MoS<sub>2</sub>/GA-GF and MoS<sub>2</sub>/GA electrodes after 50th and 500th cycles.

| Impedance*              | Cycles            | $R_s(\Omega)$ | $R_f(\Omega)$ | $R_{ct}(\Omega)$ |
|-------------------------|-------------------|---------------|---------------|------------------|
| MoS <sub>2</sub> /GA-GF | 50 <sup>th</sup>  | 2.8           | 34.5          | 15.6             |
|                         | 500 <sup>th</sup> | 1.5           | 29.0          | 13.2             |
| MoS <sub>2</sub> /GA    | 50 <sup>th</sup>  | 6.1           | 146.7         | 55.2             |
|                         | 500 <sup>th</sup> | 4.0           | 69.5          | 38.2             |

**Table S2** Comparison of electrochemical performance for MoS<sub>2</sub> composite anodes reported previously.

| Materials                                           | Cycling stability<br>(mAh g <sup>-1</sup> )                             | Rate capability<br>(mAh g <sup>-1</sup> )                           | Ref.         |
|-----------------------------------------------------|-------------------------------------------------------------------------|---------------------------------------------------------------------|--------------|
| MoS <sub>2</sub> /GA-GF                             | 1183 mAh g <sup>-1</sup> at 0.2 A g <sup>-1</sup><br>after 200 cycles   | 843 mAh g <sup>-1</sup> at 1 A g <sup>-1</sup> after<br>500 cycles  | This<br>work |
| MoS <sub>2</sub> /graphene                          | 1077 mAh g <sup>-1</sup> at 0.1 A g <sup>-1</sup><br>after 150 cycles   | 907 mAh g <sup>-1</sup> at 1 A g <sup>-1</sup> after<br>400 cycles  | 1            |
| graphene-like MoS <sub>2</sub><br>nanowall/graphene | 700 mA h g <sup>-1</sup> at 0.5 A g <sup>-1</sup><br>after 100 cycles   | 590 mAh g <sup>-1</sup> 3 A g <sup>-1</sup>                         | 2            |
| layered MoS <sub>2</sub> /graphene<br>nanoribbons   | 1009.4 mA h g <sup>-1</sup> at 0.2 A g <sup>-1</sup><br>after 80 cycles | 606.8 mA h g <sup>-1</sup> at 3 A g <sup>-1</sup>                   | 3            |
| MoS <sub>2</sub> /reduced graphene<br>oxide         | 1180 mA h g <sup>-1</sup> at 0.1 A g <sup>-1</sup><br>after 80 cycles   | 750 mAh g <sup>-1</sup> at 3 A g <sup>-1</sup>                      | 4            |
| MoS <sub>2</sub> -coated vertical<br>graphene       | 1060 mA h g <sup>-1</sup> at 0.2 A g <sup>-1</sup><br>after 100 cycles  | 818 mAh g <sup>-1</sup> at 3 A g <sup>-1</sup>                      | 5            |
| N-doped<br>graphene/MoS <sub>2</sub>                | 1205 mA h g <sup>-1</sup> at 0.1 A g <sup>-1</sup><br>after 200 cycles  | 980 mA h g <sup>-1</sup> at 1 A g <sup>-1</sup> after<br>400 cycles | 6            |
| Mesoporous-<br>carbon/MoS <sub>2</sub> / carbon     | ~1400 mA h g <sup>-1</sup> at 0.1 A g <sup>-1</sup><br>after 300 cycles | 400 mA h g <sup>-1</sup> at 10 A g <sup>-1</sup>                    | 7            |
| N-doped<br>graphene/MoS <sub>2</sub>                | ~1000 mA h g <sup>-1</sup> at 0.1 A g <sup>-1</sup><br>after 120 cycles | ~460 mAh g <sup>-1</sup> at 5 A g <sup>-1</sup>                     | 8            |
| 8.4 % MoS <sub>2</sub> -C<br>composite              | ~970 mA h g <sup>-1</sup> at 0.1 A g <sup>-1</sup><br>after 100 cycles  | 730 mAh g <sup>-1</sup> at 1 A g <sup>-1</sup>                      | 9            |
| C@MoS <sub>2</sub> @C                               | 857 mA h g <sup>-1</sup> at 0.067 A g <sup>-1</sup><br>after 100 cycles | 382 mA h g <sup>-1</sup> at 3.35 A g <sup>-1</sup>                  | 10           |
| NDG/MoS <sub>2</sub> /NDG                           | 750 mAh g <sup>-1</sup> at 0.1 A g <sup>-1</sup><br>after 100 cycles    | 552 mAh g <sup>-1</sup> at 1 A g <sup>-1</sup> after<br>600 cycles  | 11           |
| G/MoS <sub>2</sub>                                  | 931 mAh g <sup>-1</sup> at 0.1 A g <sup>-1</sup><br>after 100 cycles    | 400 mAh g <sup>-1</sup> at 2 A g <sup>-1</sup>                      | 12           |

## Reference

- 1 Y. Teng, H. Zhao, Z. Zhang, Z. Li, Q. Xia, Y. Zhang, L. Zhao, X. Du, Z. Du, P. Lv, K. Wierczek, *ACS Nano*, 2016, 10, 8526-8535.
- 2 J. Guo, X. Chen, S. Jin, M. Zhang, C. Liang, *Catal. Today*, 2015, 246, 165-171.
- 3 R. Tian, W. Wang, Y. Huang, H. Duan, Y. Guo, H. Kang, H. Li, H. Liu, *Journal of Materials Chemistry A*, 2016, 4, 13148-13154.
- 4 G. Liu, Y. Feng, Y. Li, M. Qin, H. An, W. Hu, W. Feng, *Particle and Particle Systems Characterization*, 2015, 32, 489-497.
- 5 Y. Wang, B. Chen, D.H. Seo, Z.J. Han, J.I. Wong, K. Ostrikov, H. Zhang, H.Y. Yang, *NPG Asia Materials*, 2016, 8, e268
- 6 T. T. Shan, S. Xin, Y. You, H. P. Cong, S. H. Yu, A. Manthiram, *Angewandte Chemie-International Edition*, 2016, 55, 12783-12788.
- 7 Y. Fang, Y. Lv, F. Gong, A. A. Elzatahry, G. Zheng, D. Zhao, *Advanced Materials*, 2016, 28, 9385-9390.
- 8 C. Zhao, X. Wang, J. Kong, J.M. Ang, P.S. Lee, Z. Liu, X. Lu, *Acs Applied Materials & Interfaces*, 2016, 8, 2372-2379.
- 9 W. Sun, Z. Hu, C. Wang, Z. Tao, S.-L. Chou, Y. M. Kang, H. K. Liu, *Acs Applied Materials & Interfaces*, 2016, 8, 22168-22174.
- 10 Z. Li, A. Ottmann, T. Zhang, Q. Sun, H. P. Meyer, Y. Vaynzof, J. Xiang, R. Klingeler, *Journal of Materials Chemistry A*, 2017, 5, 3987-3994.
- 11 B. Chen, Y. H. Meng, F. He, E. Z. Liu, C. S. Shi, C. N. He, L. Y. Ma, Q. Y. Li, J. J. Li and N. Q. Zhao, *Nano Energy*, 2017, 41, 154-163.
- 12 T. L. Wang, G. Zhao, C. L. Sun, L. Zhang, Y. Z. Wu, X. P. Hao and Y. L. Shao, *Advanced Materials Interfaces*, 2017, 4, 1601187.
